# Supplementary material
Source: Springer Nature journal article supplement (https://www.springermedizin.de/resource/supplementary/13032_2014_86_MOESM6_ESM.pdf/9651594)

# Type C (unstable)

**C1**

fracture  
collum anatomicum

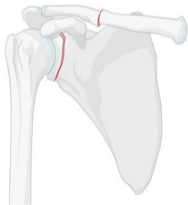

**C2**

scapula neck/superior border  
non-displaced/unstable

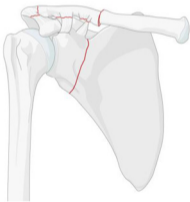

**C3**

scapula neck/superior border  
displaced/unstable

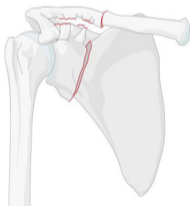

Supplement: MOESM6 [file 9651594]
